# Supplementary material
Source: PubMed Central journal article supplement (PMC8088341)
Supplement: ehaa1057_supplementary_data.pdf [file ehaa1057_supplementary_data.pdf]

## Online Appendix for the following article in the European Heart Journal:

### Predicted Benefit of the Implantable Cardioverter-Defibrillator: The MADIT-ICD Benefit Score

Arwa Younis<sup>1</sup>, MD, Jeffrey J. Goldberger<sup>2</sup>, MD, Valentina Kutiyifa<sup>1</sup>, MD, PhD, Wojciech Zareba<sup>1</sup>, MD, PhD, Helmut Klein<sup>1</sup>, MD, Mehmet K. Aktas<sup>1</sup>, MD, MBA, David Huang<sup>1</sup>, MD, James Daubert<sup>3</sup>, MD, Mark Estes<sup>4</sup>, MD, David Cannom,<sup>5</sup> MD, Scott McNitt<sup>1</sup>, Bronislava Polonsky<sup>1</sup>, MS, Ilan Goldenberg<sup>1</sup>, MD

1. Clinical Cardiovascular Research Center, University of Rochester, NY, USA
2. Miller School of Medicine, University of Miami, Miami, FL, USA
3. Division of Cardiology, Duke University, Durham, NC, USA
4. University of Pittsburgh Medical Center, Pittsburgh, PA, USA
5. Good Samaritan Hospital, Los Angeles, CA

---

## INDEX

| Page No. | Description |
|----------|-------------|
|----------|-------------|

|       |                                                                                                                                                                                 |
|-------|---------------------------------------------------------------------------------------------------------------------------------------------------------------------------------|
| 2     | Table A - List of the Multicenter Automatic Defibrillator Implantation Trials                                                                                                   |
| 3     | Table B - Arrhythmia definition by the adjudication committee per protocol.                                                                                                     |
| 4     | Table C - List of Variables that were included in the Fine and Gray models.                                                                                                     |
| 5     | Table D – Baseline Characteristics of RAID Cohort.                                                                                                                              |
| 6     | Table E – No. of patients, their frequency, and the corresponding VT/VF Risk-Score                                                                                              |
| 7     | Table F – Number of Patients, their Frequency, and the Corresponding Non-arrhythmic Mortality Risk Group                                                                        |
| 8-10  | MADIT-ICD Benefit Score                                                                                                                                                         |
| 11    | Table G – Life-gained with the ICD at Three Years <sup>7</sup> stratified by MADIT-ICD Benefit Group.                                                                           |
| 11    | Figure A – Example for Life-Gain Calculation at Three Years                                                                                                                     |
| 12-13 | Figure B – Comparison between the predicted and the observed rates for fast ventricular tachycardia ( $\geq 200$ bpm or ventricular fibrillation) and non-arrhythmic mortality  |
| 14    | Figure C – The Cumulative 3-Year Rates of Any Monitored/Treated VT/VF faster or equal to 170 bpm Compared with the Rates of Non-arrhythmic Mortality                            |
| 14-15 | Figure D – Receiver Operating Characteristic Curve for; C1) Non-arrhythmic Mortality Score (Death without prior Ventricular Tachy-Arrhythmia (VT/VF)) and C2) VT/VF Risk-Score. |

**Online Supplementary Table A - List of the Multicenter Automatic Defibrillator Implantation Trials (MADIT)**

| Trial name | Year | Number of subjects | Study population | Enrollment criteria                                               | Randomization                                                                                        | Mean follow up duration (years) |
|------------|------|--------------------|------------------|-------------------------------------------------------------------|------------------------------------------------------------------------------------------------------|---------------------------------|
| MADIT II   | 2002 | 1232               | ICM              | Prior MI<br>LVEF $\leq$ 30%                                       | ICD versus medical therapy                                                                           | 2                               |
| MADIT Risk | 2005 | 765                | ICM              | Prior MI<br>LVEF $\leq$ 30%                                       | ICD arm only                                                                                         | 2                               |
| MADIT CRT  | 2009 | 1820               | ICM and non-ICM  | NYHA I or II<br>LVEF $\leq$ 30%<br>QRS $\geq$ 130 ms              | CRT-D versus ICD                                                                                     | 2.4                             |
| MADIT RIT  | 2012 | 1500               | ICM and non-ICM  | Patients who met primary prevention criteria for ICD implantation | Three arms based on programming:<br>i. Conventional<br>ii. High rate cutoff<br>iii. Delay in therapy | 1.4                             |
| RAID       | 2017 | 1012               | ICM and non-ICM  | Patients with ICD or CRT-D                                        | Ranolazine vs. Placebo                                                                               | 2.3                             |

**Online Supplementary Table B - Arrhythmia definition by the adjudication committee per protocol.**

| Trial name                         | Arrhythmia definition according to the study protocol                                                                                                                                                                                                                                                                                                                                                                                                                                                                                                                                                                                                                                                                                                                                |
|------------------------------------|--------------------------------------------------------------------------------------------------------------------------------------------------------------------------------------------------------------------------------------------------------------------------------------------------------------------------------------------------------------------------------------------------------------------------------------------------------------------------------------------------------------------------------------------------------------------------------------------------------------------------------------------------------------------------------------------------------------------------------------------------------------------------------------|
| MADIT II, MADIT RISK and MADIT CRT | <p>Devices were programmed to monitor + therapy, with a protocol recommendation to a setting of the VT zone at 180 bpm and the VF zone at 250 bpm. Sensitivity was programmed according to physician discretion. Detection was 2.5 seconds for the VT zone and 1.0 second for the VF zone. The protocol recommended programming the VT zone first therapy to burst-type antitachycardia pacing with 8 pulses at 88% of the measured cycle length with a 10-ms decrement between bursts, then shock therapy; second therapy should be shock at the defibrillation threshold plus at least 10 J (if possible). The remaining therapies should be maximal energy shocks. The ICDs were interrogated quarterly. All Events were adjudicated blindly by at least 2 committee members.</p> |
| MADIT RIT                          | <ol style="list-style-type: none"> <li data-bbox="495 799 1400 921">1. VT – based on combined evaluation of frequency, QRS morphology, and regularity of the rhythm. Has to last for more than 30 beats, or if therapy was administered and terminated arrhythmia. (Includes polymorphic VT). Detection zone was 145 bpm in all treatment arms.</li> <li data-bbox="495 952 1422 1009">2. VF – based on combined evaluation of frequency (&gt;200 BPM), QRS morphology, and regularity of the rhythm.</li> </ol>                                                                                                                                                                                                                                                                     |

## Online Supplementary Table C - List of Variables that were included in the Fine and Gray models.

|                                                                                      |
|--------------------------------------------------------------------------------------|
| Age at enrollment dichotomized at 65 years                                           |
| Atrial arrhythmia <sup>‡</sup>                                                       |
| Female                                                                               |
| Angiotensin converting enzyme inhibitor or angiotensin receptor blocker              |
| Beta-blocker                                                                         |
| Diuretic                                                                             |
| Amiodarone                                                                           |
| Aspirin                                                                              |
| Body mass index at enrollment dichotomized at 23 kg/m <sup>2</sup> (lowest quartile) |
| Body mass index at enrollment dichotomized at 30 kg/m <sup>2</sup>                   |
| Cardiac resynchronization therapy                                                    |
| Left ventricular ejection fraction dichotomized at 25%                               |
| Heart rate dichotomized at 75 bpm                                                    |
| Age at enrollment dichotomized at 75 years                                           |
| Heart rate dichotomized at 70 bpm                                                    |
| Systolic blood pressure dichotomized at 120 mmHg                                     |
| Diastolic blood pressure dichotomized at 80 mmHg                                     |
| Hypertension                                                                         |
| Prior coronary artery bypass grafting                                                |
| Prior percutaneous coronary intervention (balloon and/or stent)                      |
| Diabetes                                                                             |
| New York Heart Association functional class ≥II                                      |
| Previous smoking                                                                     |
| Prior non-sustained ventricular tachycardia <sup>‡‡</sup>                            |
| Prior clinical myocardial infarction <sup>*</sup>                                    |
| Hispanic ethnicity                                                                   |
| Ischemic cardiomyopathy <sup>^</sup>                                                 |

<sup>‡</sup> Any atrial arrhythmia (beside sinus tachycardia) requiring medical treatment (drugs or ablation).

<sup>‡‡</sup> Non-sustained ventricular tachycardia (<30 seconds) requiring medical treatment (drugs or ablation).

<sup>\*</sup> Symptomatic clinical myocardial infarction with enzyme positive or ECG positive presentation, more than 90 days before enrollment.

<sup>^</sup> Ischemic cardiomyopathy was defined as; a documented (Q-wave, enzyme-positive, radiological evidence) of prior myocardial infarction more than 90 days before enrollment, and/or one or more prior coronary artery bypass graft surgeries or percutaneous coronary interventions (ballon and/or stent angioplasty) more than 90 days before enrollment.

**Online Supplementary Table D – Baseline Characteristics of RAID Cohort.**

| <b>Clinical Characteristics</b>        | <b>No. (%)/ or Mean <math>\pm</math> stdv</b> |
|----------------------------------------|-----------------------------------------------|
| Number of Patients, #                  | 669                                           |
| Ranolazine treatment                   | 337(50)                                       |
| Age at enrollment                      | 64.0 $\pm$ 10.1                               |
| Ischemic Cardiomyopathy                | 340(51)                                       |
| NYHA Class: I/II                       | 454(70)                                       |
| NYHA Class: III                        | 189(30)                                       |
| Hypertension                           | 523(79)                                       |
| Diabetes                               | 251(38)                                       |
| Atrial Fibrillation                    | 160(24)                                       |
| Left ventricular ejection fraction (%) | 28.1 $\pm$ 9.1                                |
| QRS duration (ms)                      | 134.3 $\pm$ 31.1                              |
| ICD                                    | 315(47)                                       |
| CRT-D                                  | 354(53)                                       |
| Serum creatinine (mg/dl)               | 1.1 $\pm$ 0.3                                 |
| GFR mL/min/1.73 m <sup>2</sup>         | 74.8 $\pm$ 23.9                               |
| B-type natriuretic peptide (pg/ml)     | 1417.3 $\pm$ 1996.6                           |
| Beta Blockers                          | 631(94)                                       |
| ACE/ARBs                               | 585(88)                                       |
| Statins                                | 485(73)                                       |
| Digitalis                              | 130(19)                                       |
| Diuretics                              | 541(81)                                       |
| Mineralocorticoid antagonists          | 269(40)                                       |
| Amiodarone                             | 55(8)                                         |
| Metformin                              | 118(18)                                       |

**Online supplementary Table E – Number of patients, their frequency, and the corresponding VT/VF Risk-Score group.**

| VT/VF Risk-Score group | Score points | Number of patients | Percent | Cumulative number of Patients | Cumulative Percentage |
|------------------------|--------------|--------------------|---------|-------------------------------|-----------------------|
| <b>Low (&lt;7)</b>     | 0            | 6                  | 0.15    | 6                             | 0.15                  |
|                        | 1            | 14                 | 0.35    | 20                            | 0.50                  |
|                        | 2            | 102                | 2.54    | 122                           | 3.04                  |
|                        | 3            | 100                | 2.49    | 222                           | 5.52                  |
|                        | 4            | 399                | 9.93    | 621                           | 15.45                 |
|                        | 5            | 365                | 9.08    | 986                           | 24.53                 |
|                        | 6            | 763                | 18.98   | 1749                          | 43.52                 |
| <b>High (≥7)</b>       | 7            | 575                | 14.31   | 2324                          | 57.83                 |
|                        | 8            | 770                | 19.16   | 3094                          | 76.98                 |
|                        | 9            | 548                | 13.64   | 3642                          | 90.62                 |
|                        | 10           | 271                | 6.74    | 3913                          | 97.36                 |
|                        | 11           | 84                 | 2.09    | 3997                          | 99.45                 |
|                        | 12           | 21                 | 0.52    | 4018                          | 99.98                 |
|                        | 13           | 1                  | 0.02    | 4019                          | 100.00                |

**Online Supplementary Table F – Number of Patients, their Frequency, and the Corresponding Non-arrhythmic Mortality Risk Group**

| <b>Non-arrhythmic Mortality Risk Group</b> | <b>Points</b> | <b>Number of Patients</b> | <b>Percent</b> | <b>Cumulative Number</b> | <b>Cumulative Percentage</b> |
|--------------------------------------------|---------------|---------------------------|----------------|--------------------------|------------------------------|
| <b>Low (<math>\leq 2</math>)</b>           | <b>-1</b>     | 48                        | 1.18           | 48                       | 1.18                         |
|                                            | <b>0</b>      | 389                       | 9.60           | 437                      | 10.78                        |
|                                            | <b>1</b>      | 647                       | 15.96          | 1084                     | 26.75                        |
|                                            | <b>2</b>      | 782                       | 19.29          | 1866                     | 46.04                        |
| <b>High (<math>\geq 3</math>)</b>          | <b>3</b>      | 781                       | 19.27          | 2647                     | 65.31                        |
|                                            | <b>4</b>      | 629                       | 15.52          | 3276                     | 80.83                        |
|                                            | <b>5</b>      | 417                       | 10.29          | 3693                     | 91.12                        |
|                                            | <b>6</b>      | 360                       | 8.87           | 4053                     | 100.00                       |

## MADIT-ICD Benefit Score Matrix –

| <u>VTVF Score</u> | <u>Mortality Score</u> | <u>Benefit Score</u> | <u>ICD Benefit Group</u> | <u>VTVF Score</u> | <u>Mortality Score</u> | <u>Benefit Score</u> | <u>ICD Benefit Group</u> | <u>VTVF Score</u> | <u>Mortality Score</u> | <u>Benefit Score</u> | <u>ICD Benefit Group</u> |
|-------------------|------------------------|----------------------|--------------------------|-------------------|------------------------|----------------------|--------------------------|-------------------|------------------------|----------------------|--------------------------|
| 0                 | ≥6                     | 0                    | Lowest                   | 2                 | 1                      | 34                   | Intermediate             | 11                | 4                      | 67                   | Intermediate             |
| 0                 | 5                      | 1                    | Lowest                   | 2                 | 0                      | 35                   | Intermediate             | 11                | 3                      | 68                   | Intermediate             |
| 0                 | 4                      | 2                    | Lowest                   | 2                 | -1                     | 36                   | Intermediate             | 12                | ≥6                     | 69                   | Intermediate             |
| 0                 | 3                      | 3                    | Lowest                   | 3                 | 2                      | 37                   | Intermediate             | 12                | 5                      | 70                   | Intermediate             |
| 1                 | ≥6                     | 4                    | Lowest                   | 3                 | 1                      | 38                   | Intermediate             | 12                | 4                      | 71                   | Intermediate             |
| 1                 | 5                      | 5                    | Lowest                   | 3                 | 0                      | 38                   | Intermediate             | 12                | 3                      | 71                   | Intermediate             |
| 1                 | 4                      | 6                    | Lowest                   | 3                 | -1                     | 39                   | Intermediate             | 13                | ≥6                     | 72                   | Intermediate             |
| 1                 | 3                      | 7                    | Lowest                   | 4                 | 2                      | 40                   | Intermediate             | 13                | 5                      | 73                   | Intermediate             |
| 2                 | ≥6                     | 8                    | Lowest                   | 4                 | 1                      | 41                   | Intermediate             | 13                | 4                      | 74                   | Intermediate             |
| 2                 | 5                      | 9                    | Lowest                   | 4                 | 0                      | 42                   | Intermediate             | 13                | 3                      | 75                   | Intermediate             |
| 2                 | 4                      | 10                   | Lowest                   | 4                 | -1                     | 43                   | Intermediate             | 7                 | 2                      | 76                   | Highest                  |
| 2                 | 3                      | 11                   | Lowest                   | 5                 | 2                      | 44                   | Intermediate             | 7                 | 1                      | 77                   | Highest                  |
| 3                 | ≥6                     | 12                   | Lowest                   | 5                 | 1                      | 45                   | Intermediate             | 7                 | 0                      | 78                   | Highest                  |
| 3                 | 5                      | 13                   | Lowest                   | 5                 | 0                      | 46                   | Intermediate             | 7                 | -1                     | 79                   | Highest                  |
| 3                 | 4                      | 13                   | Lowest                   | 5                 | -1                     | 46                   | Intermediate             | 8                 | 2                      | 79                   | Highest                  |
| 3                 | 3                      | 14                   | Lowest                   | 6                 | 2                      | 47                   | Intermediate             | 8                 | 1                      | 80                   | Highest                  |
| 4                 | ≥6                     | 15                   | Lowest                   | 6                 | 1                      | 48                   | Intermediate             | 8                 | 0                      | 81                   | Highest                  |
| 4                 | 5                      | 16                   | Lowest                   | 6                 | 0                      | 49                   | Intermediate             | 8                 | -1                     | 82                   | Highest                  |
| 4                 | 4                      | 17                   | Lowest                   | 6                 | -1                     | 50                   | Intermediate             | 9                 | 2                      | 83                   | Highest                  |
| 4                 | 3                      | 18                   | Lowest                   | 7                 | ≥6                     | 51                   | Intermediate             | 9                 | 1                      | 84                   | Highest                  |
| 5                 | ≥6                     | 19                   | Lowest                   | 7                 | 5                      | 52                   | Intermediate             | 9                 | 0                      | 85                   | Highest                  |
| 5                 | 5                      | 20                   | Lowest                   | 7                 | 4                      | 53                   | Intermediate             | 9                 | -1                     | 86                   | Highest                  |
| 5                 | 4                      | 21                   | Lowest                   | 7                 | 3                      | 54                   | Intermediate             | 10                | 2                      | 87                   | Highest                  |
| 5                 | 3                      | 21                   | Lowest                   | 8                 | ≥6                     | 54                   | Intermediate             | 10                | 1                      | 88                   | Highest                  |
| 6                 | ≥6                     | 22                   | Lowest                   | 8                 | 5                      | 55                   | Intermediate             | 10                | 0                      | 88                   | Highest                  |
| 6                 | 5                      | 23                   | Lowest                   | 8                 | 4                      | 56                   | Intermediate             | 10                | -1                     | 89                   | Highest                  |
| 6                 | 4                      | 24                   | Lowest                   | 8                 | 3                      | 57                   | Intermediate             | 11                | 2                      | 90                   | Highest                  |
| 6                 | 3                      | 25                   | Lowest                   | 9                 | ≥6                     | 58                   | Intermediate             | 11                | 1                      | 91                   | Highest                  |
| 0                 | 2                      | 26                   | Intermediate             | 9                 | 5                      | 59                   | Intermediate             | 11                | 0                      | 92                   | Highest                  |
| 0                 | 1                      | 27                   | Intermediate             | 9                 | 4                      | 60                   | Intermediate             | 11                | -1                     | 93                   | Highest                  |
| 0                 | 0                      | 28                   | Intermediate             | 9                 | 3                      | 61                   | Intermediate             | 12                | 2                      | 94                   | Highest                  |
| 0                 | -1                     | 29                   | Intermediate             | 10                | ≥6                     | 62                   | Intermediate             | 12                | 1                      | 95                   | Highest                  |
| 1                 | 2                      | 29                   | Intermediate             | 10                | 5                      | 63                   | Intermediate             | 12                | ≤0                     | 96                   | Highest                  |
| 1                 | 1                      | 30                   | Intermediate             | 10                | 4                      | 63                   | Intermediate             | 13                | 2                      | 97                   | Highest                  |
| 1                 | 0                      | 31                   | Intermediate             | 10                | 3                      | 64                   | Intermediate             | 13                | 1                      | 98                   | Highest                  |
| 1                 | -1                     | 32                   | Intermediate             | 11                | ≥6                     | 65                   | Intermediate             | 13                | 0                      | 99                   | Highest                  |
| 2                 | 2                      | 33                   | Intermediate             | 11                | 5                      | 66                   | Intermediate             | 13                | -1                     | 100                  | Highest                  |



## How to calculate the MADIT-ICD Benefit Score -

The score can be calculated in 2 ways:

1. Using the free provided website (<https://is.gd/madit>)
2. Manually – 4 steps approach:

**Step I) Calculate the VTVF Score** (by adding the points of the variables found in Table 2):

**VTVF Score** [variable (given points if positive)] = LVEF $\leq$ 25% (1) + ATA (1) + HR $>$ 75bpm (1) + SBP $<$ 140mmHg (2) + MI (2) + Age $<$ 75yrs (2) + Male (2) + NSVT (2) = Range 0 to 13 points

**Step II) Calculate the Non-arrhythmic Mortality Score** (by adding the points of the variables found in table 3):

**Non-arrhythmic Mortality Score** = ATA (2) + Diabetes (1) + BMI $<$ 23kg/m<sup>2</sup> (2) + NYHA $\geq$ II (1) + LVEF $\leq$ 25% (2) + Age $\geq$ 75yrs (2) – CRTD (1) = Range -1 to 10 points

**Step III) The MADIT-ICD Benefit Group:**

Find the Benefit Group and the estimated risk by performing cross tabulation using the graphical abstract main figure, or using the following “If statement”:

- If VTVF Score  $\geq$  7 and Non-arrhythmic Mortality Score  $<$  3 then Highest Benefit Group
- If VTVF Score  $\geq$  7 and Non-arrhythmic Mortality Score  $\geq$  3 then Intermediate Benefit Group
- If VTVF Score  $<$  7 and Non-arrhythmic Mortality Score  $<$  3 then Intermediate Benefit Group
- If VTVF Score  $<$  7 and Non-arrhythmic Mortality Score  $\geq$  3 then Lowest Benefit Group

**Step IV) The Numerical MADIT-ICD Benefit Score:**

Find the corresponding score based on the Matrix found above (page 8).

**Example = Patient #1:** Female, 67yrs, HR 72bpm, SBP 145mmHg, BMI 24kg/m<sup>2</sup>, LVEF 28%, NYHA II, diabetes, and is not CRT-D candidate.

**Step I) VT/VF 2 points**

**Step II) Mortality 2 points**

**Step III) The MADIT-ICD Benefit Group**

- Cross tabulation using the graph:

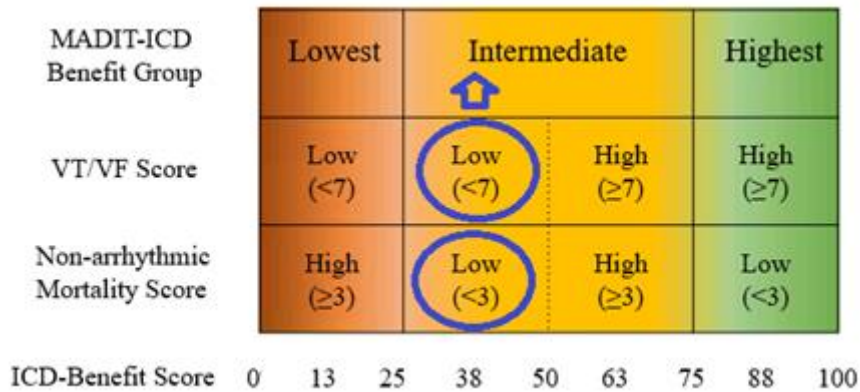

- Cross tabulation using the “If statement”:

In this case we will be using the third “If statement”;

If VT/VF Score < 7 and Non-arrhythmic Mortality Score < 3 then Intermediate Benefit Group

**Step IV) Find the numerical MADIT-ICD Benefit Score and the corresponding predicted benefit using the Matrix.**

| <u>VT/VF Score</u> | <u>Mortality Score</u> | <u>Benefit Score</u> | <u>ICD Benefit Group</u> |
|--------------------|------------------------|----------------------|--------------------------|
| 1                  | -1                     | 32                   | Intermediate             |
| 2                  | 2                      | 33                   | Intermediate             |
| 2                  | 1                      | 34                   | Intermediate             |
| 2                  | 0                      | 35                   | Intermediate             |

Accordingly, for this patient (VT/VF score=2 and Non-arrhythmic Mortality Score=2) the predicted score of 33 (100 reflects highest benefit and 0 reflects lowest benefit)

**Online Supplementary Table G – Life-gained with the ICD at Three Years' Time  
Post Implantation stratified by MADIT-ICD Benefit Group.**

| MADIT-ICD<br>Benefit Group | Life Gained in Days |            |            |
|----------------------------|---------------------|------------|------------|
|                            | At 1 year           | At 2 years | At 3 years |
| Highest                    | 11                  | 41         | 74         |
| Intermediate               | 5                   | 18         | 31         |
| Lowest                     | 3                   | 4          | 6          |

**Online Supplementary Figure A – Example for Life-Gain Estimation at Three Years**

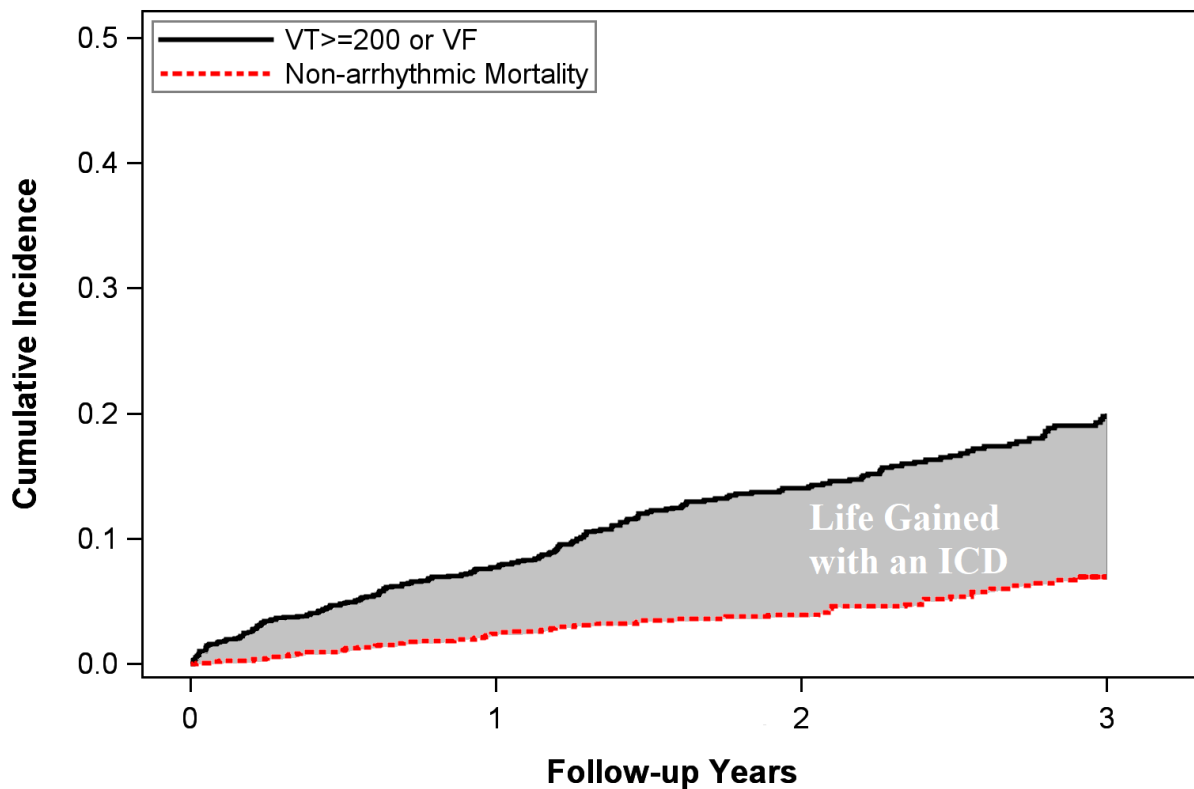

**Online Supplementary Figure B – Comparison between the predicted and the observed rates for fast ventricular tachycardia ( $\geq 200$  bpm or ventricular fibrillation) and non-arrhythmic mortality.**

**B1) VT $\geq 200$  or VF**

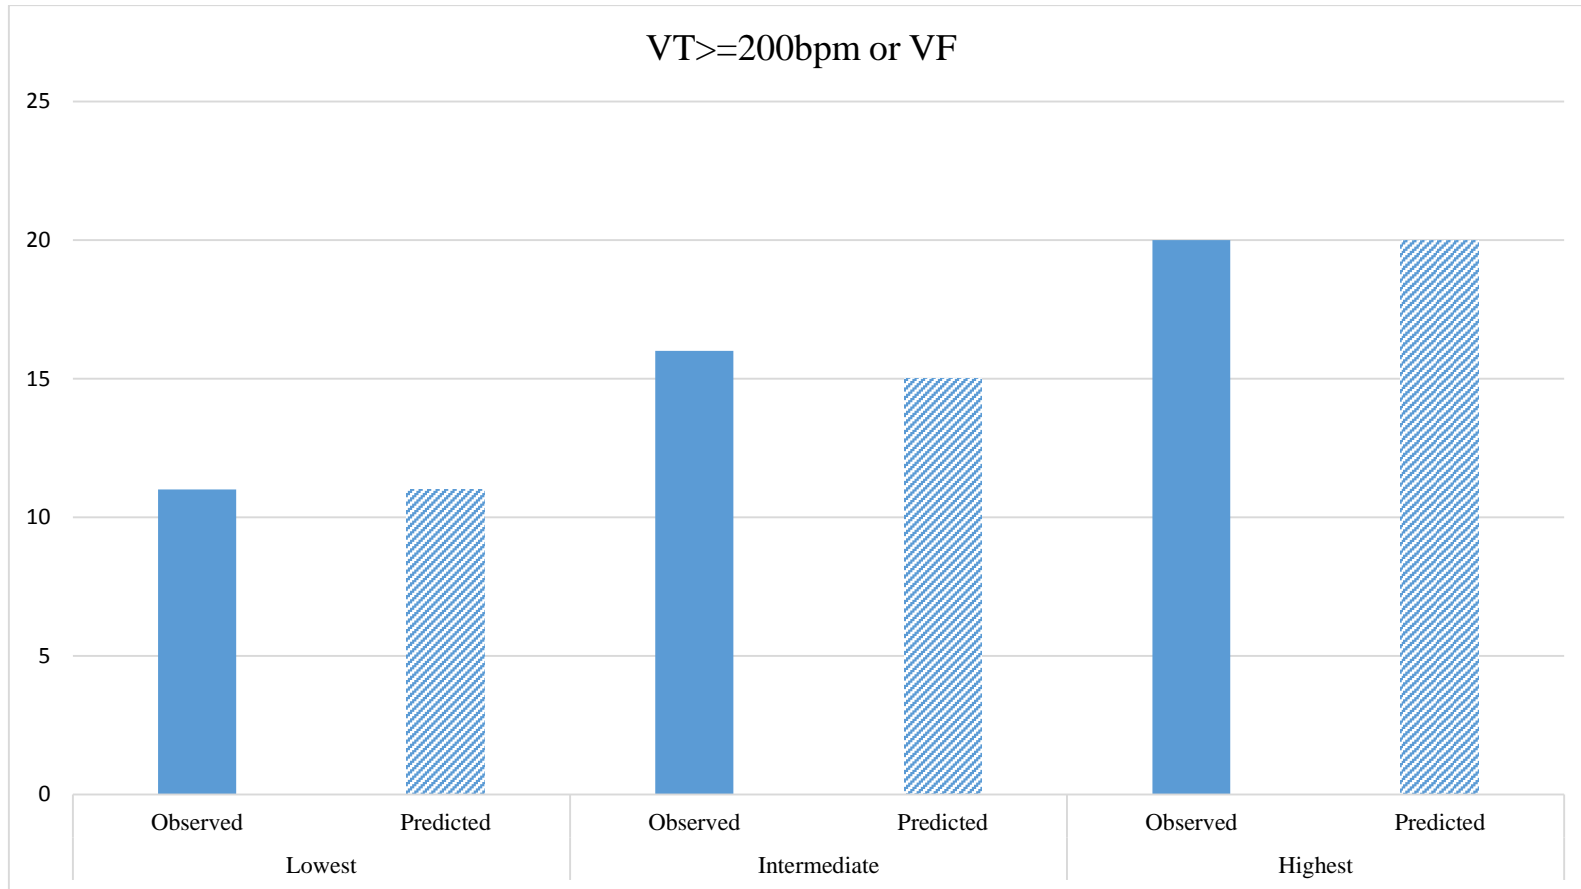

**B2) Non-arrhythmic mortality**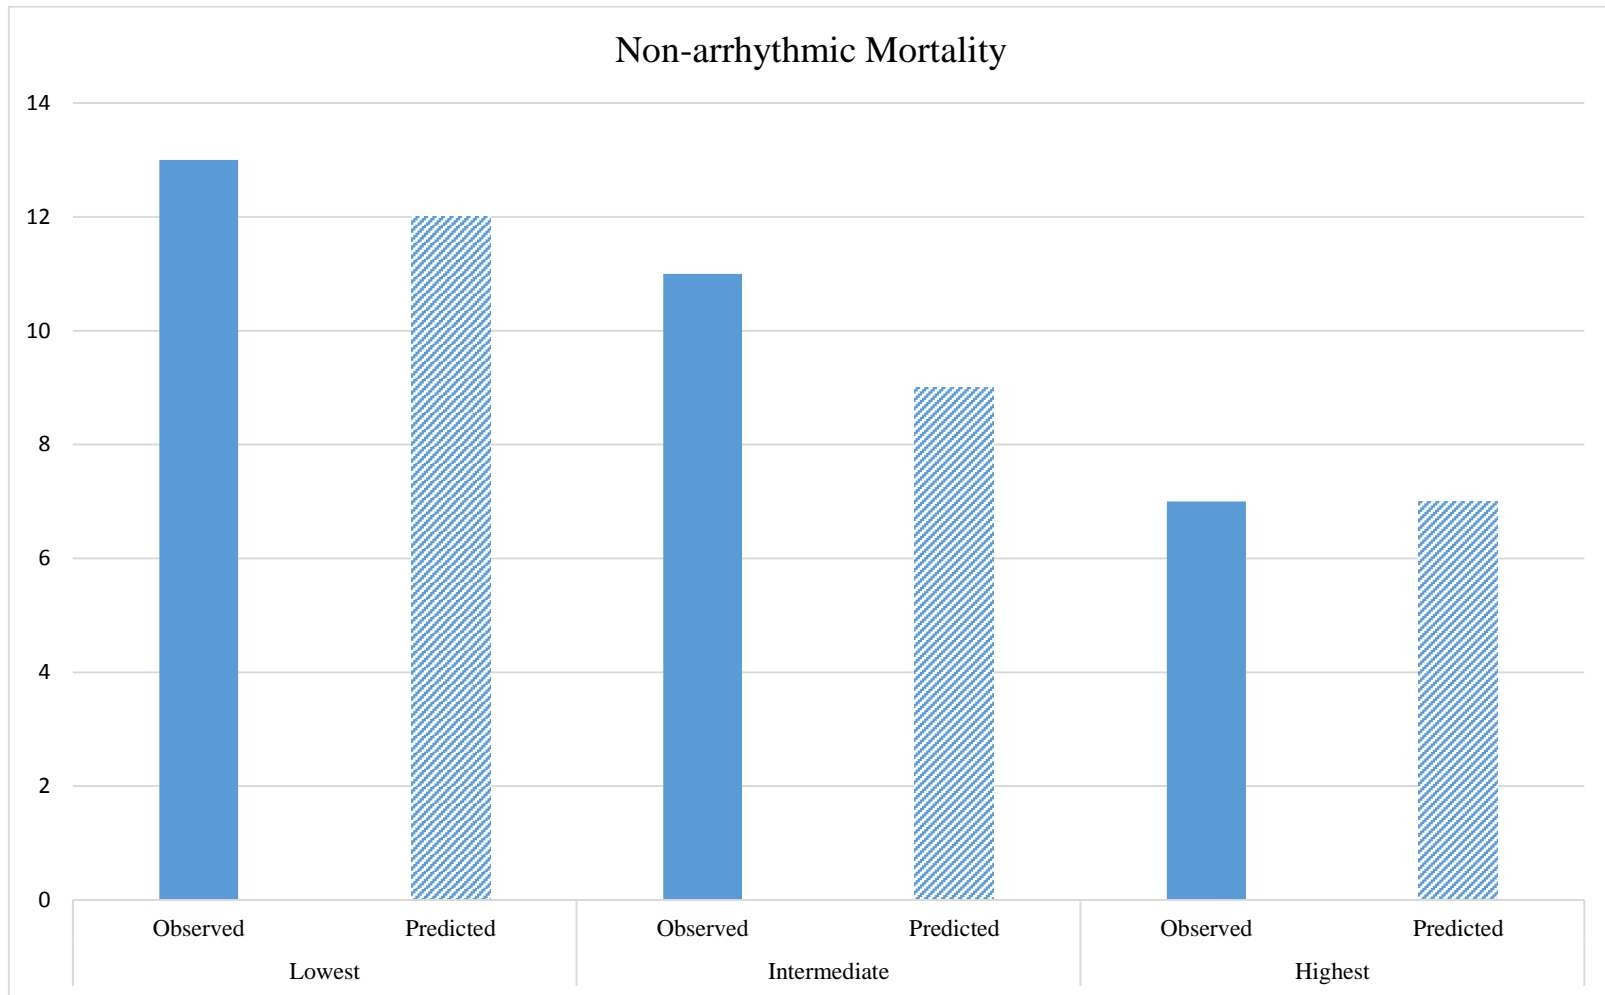

**Online Supplementary Figure C – The Cumulative 3-Year Rates of Any Monitored/Treated Ventricular Tachycardia/Fibrillation (VT/VF) faster or equal to 170 bpm Compared with the Rates of Non-arrhythmic Mortality (Death without Prior VT/VF at a rate of  $\geq 170$  bpm) stratified by the MADIT-ICD Benefit Group.**

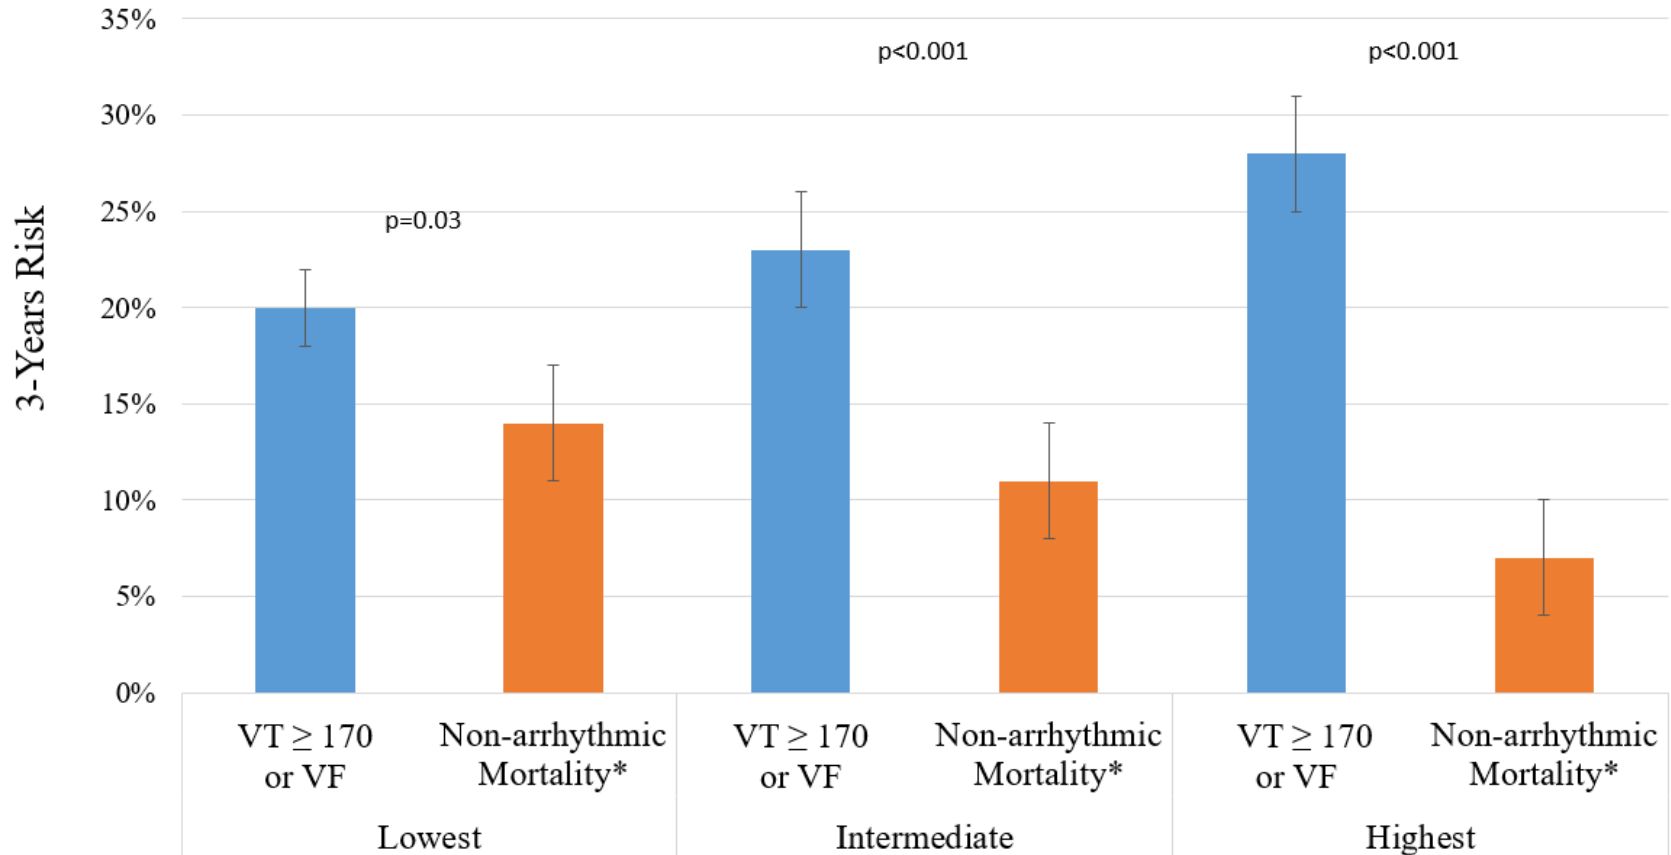

**Online Supplementary Figure D1 – Receiver Operating Characteristic Curve for the Non-arrhythmic Mortality Score (Death without prior Ventricular Tachy-Arrhythmia (VT/VF)) Risk-Score.**

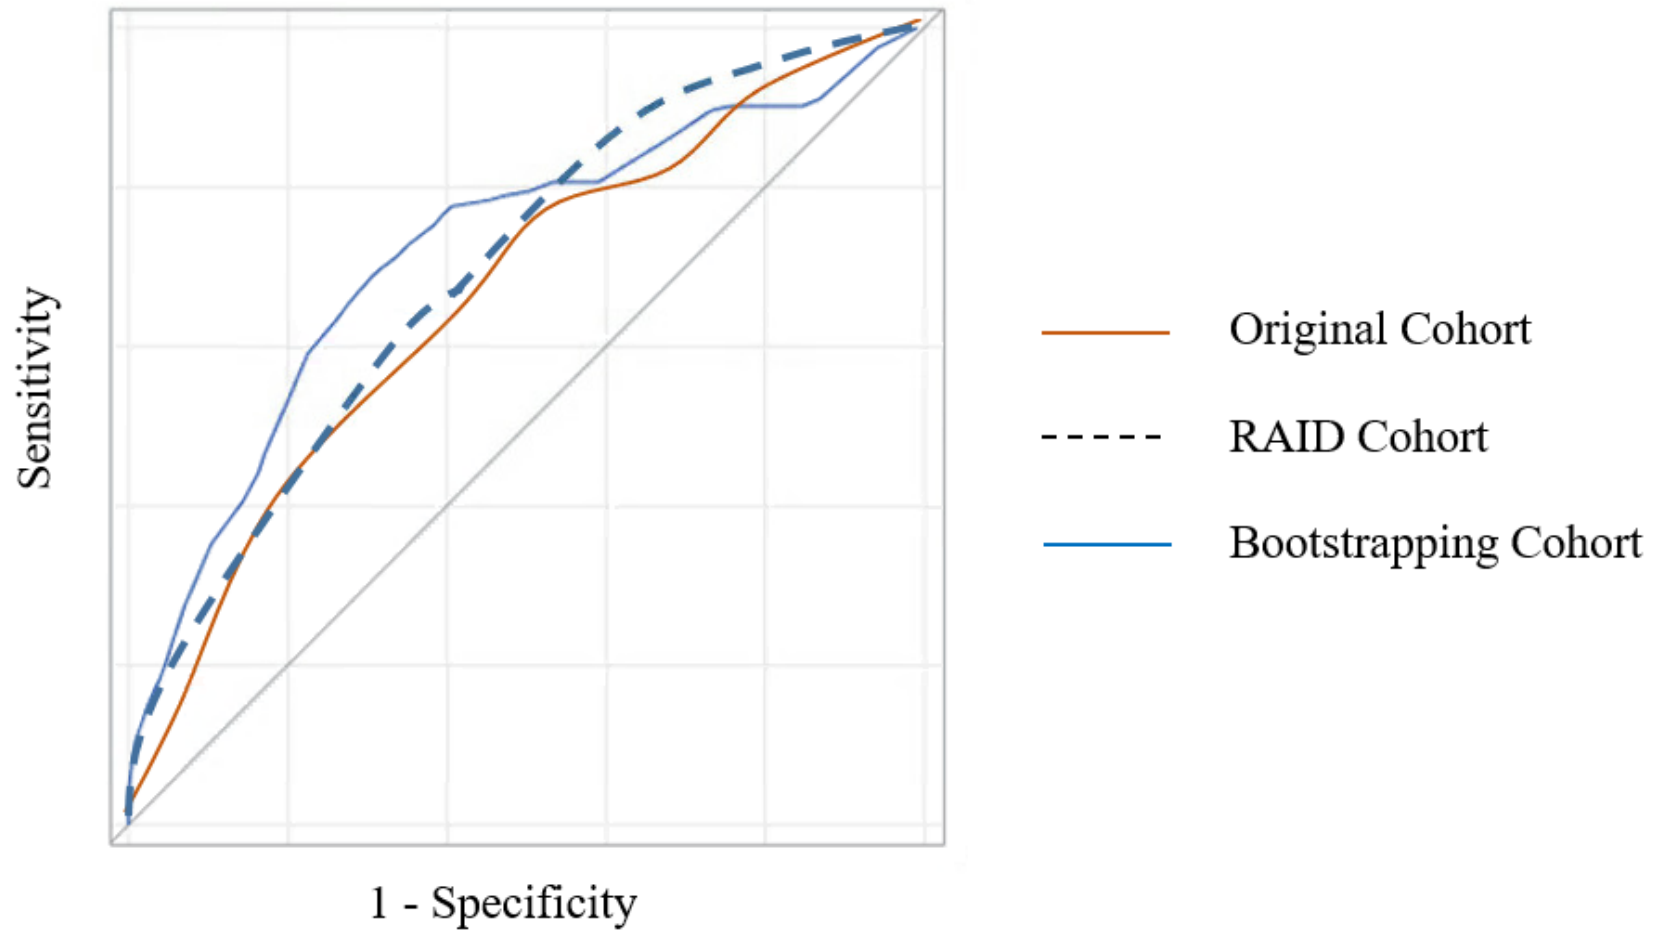

**Online eFigure D2 – Receiver Operating Characteristic Curve for the Ventricular Tachy-Arrhythmia (VT $\geq$ 200 bpm or VF) Risk-Score.**

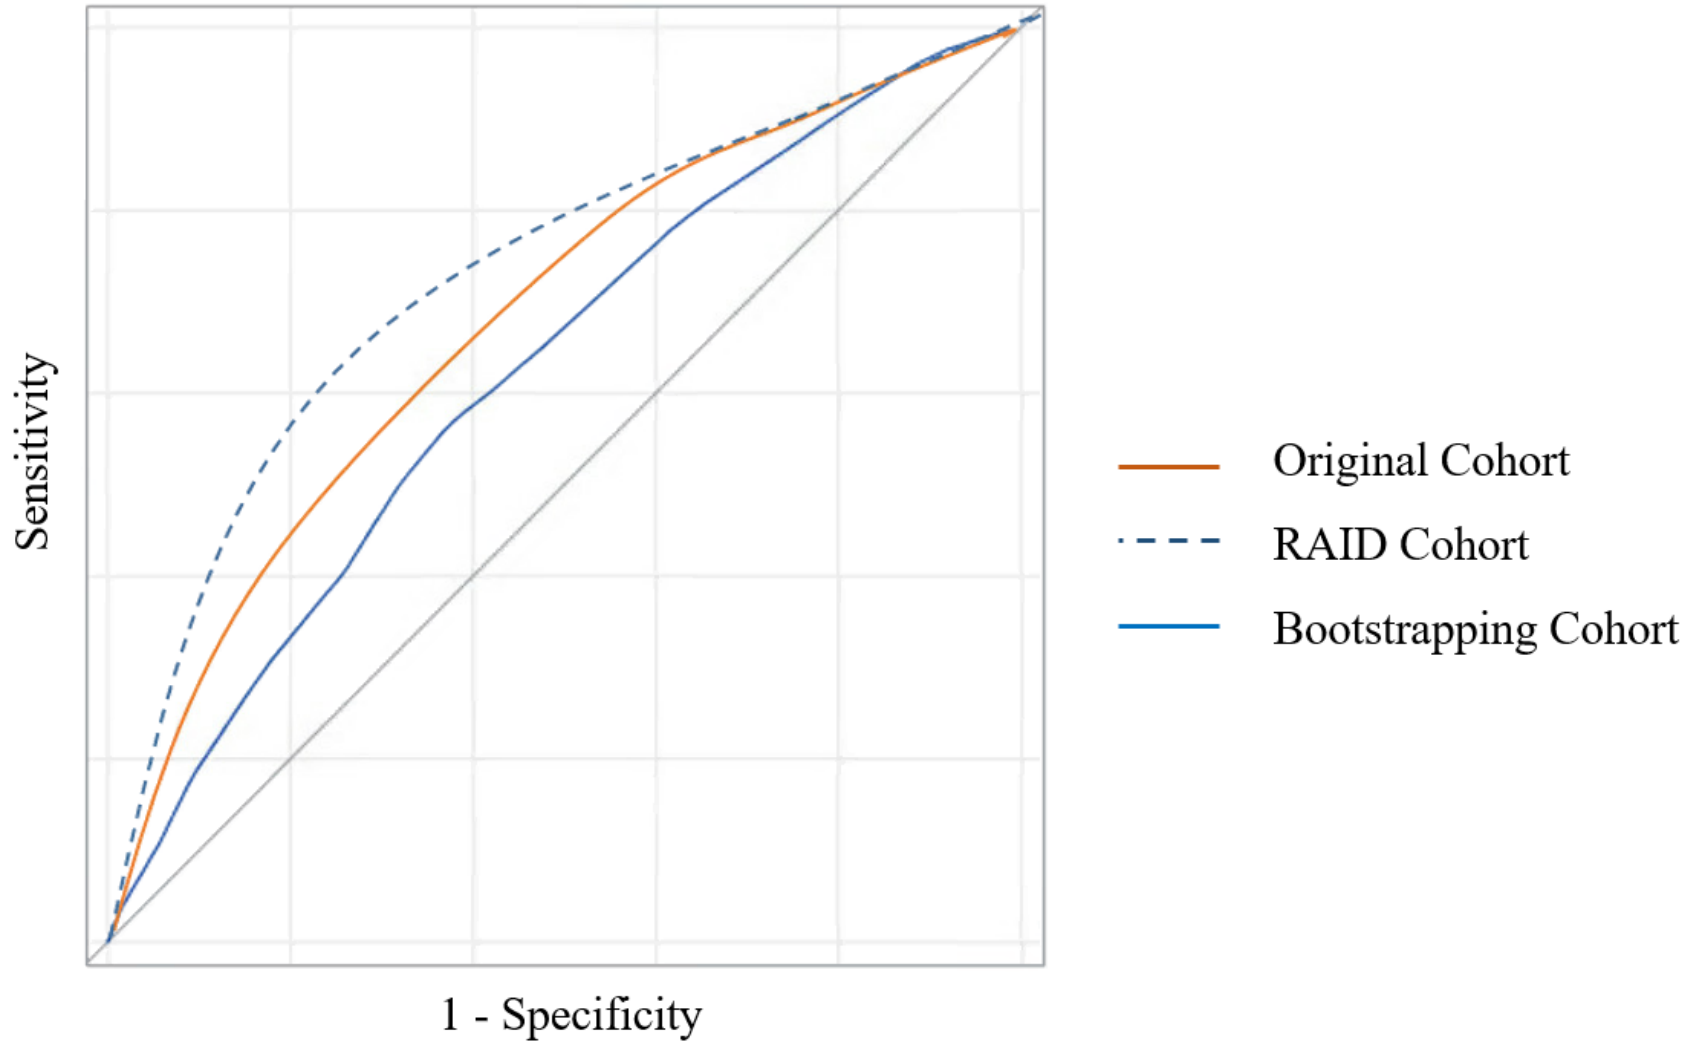



Word count

Abstract = 246

Text + references + figure legends + tables = 5380

## **Permissions information**

The authors do hereby declare that all illustrations and figures in the manuscript are entirely original and do not require reprint permission.

Ilan Goldenberg, MD

## **DISCLOSURE**

Arwa Younis, Jeffrey J. Goldberger, Helmut Klein, Mehmet K. Aktas, David Huang, Scott McNitt, and Bronislava Polonsky – none

Valentina Kutyaifa – has received research grants from Boston Scientific, Biotronik, and ZOLL Inc., Spire Inc., and has consultant agreements with ZOLL Inc., and Biotronik

Wojciech Zareba – research grants from Boston Scientific

James Daubert - research grants from Boston Scientific

Mark Estes - research grants from Boston Scientific, consulting Fees, Boston Scientific, Abbott, and Medtronic.

David Cannom - research grants from Boston Scientific

Kenneth Stein – Chief Medical Officer for Rhythm Management at *Boston Scientific*.

Ilan Goldenberg - research grants from Boston Scientific, Medtronic, Zoll
